# Supplementary material
Source: PubMed Central journal article supplement (PMC3077712)
Supplement: NIHMS283532-supplement-Supplemental_Figure_6.pdf [file NIHMS283532-supplement-Supplemental_Figure_6.pdf]

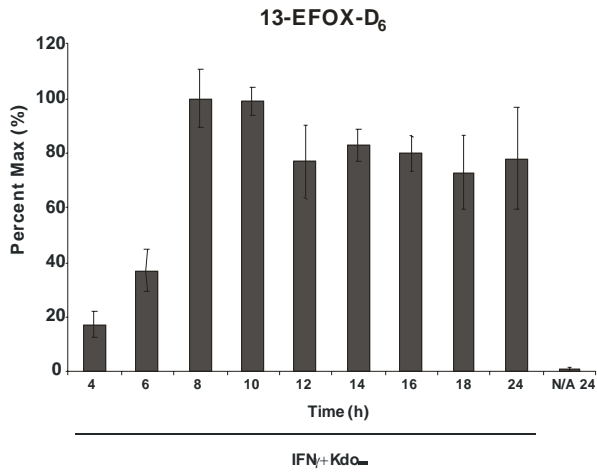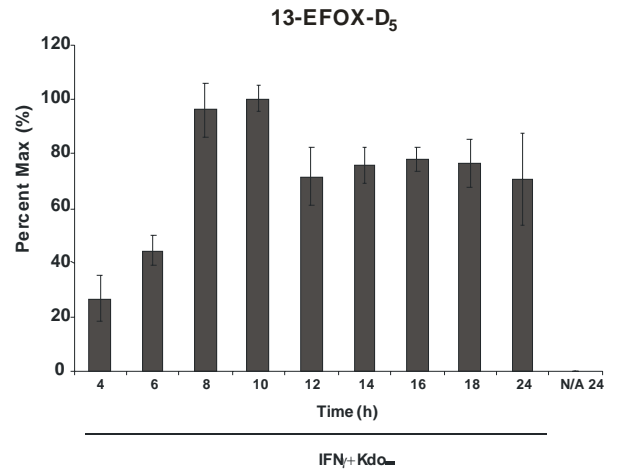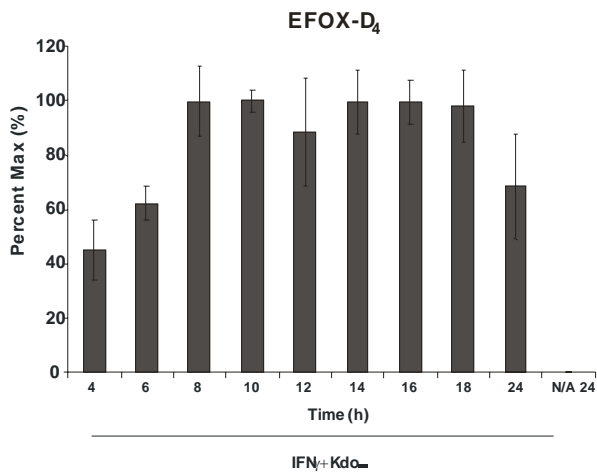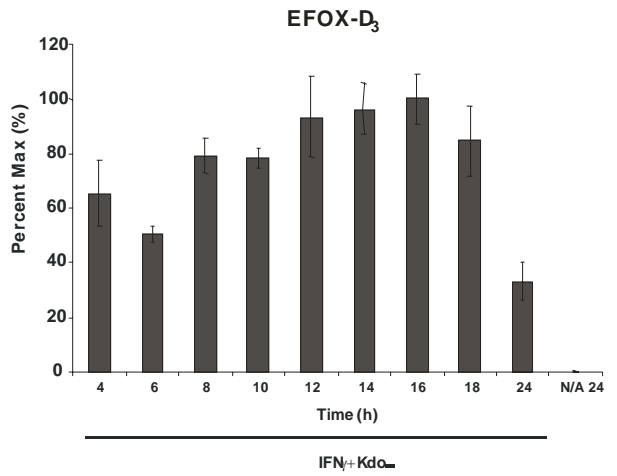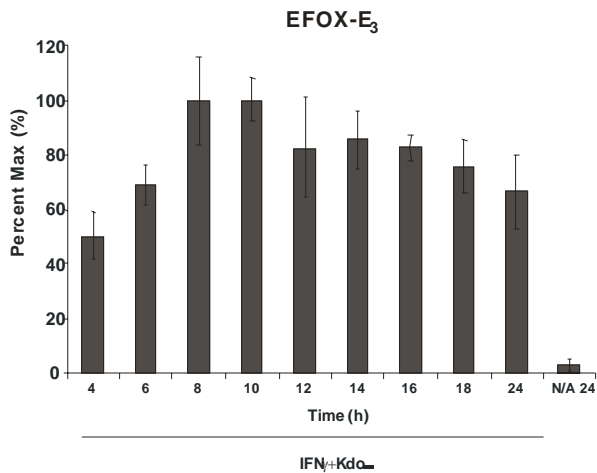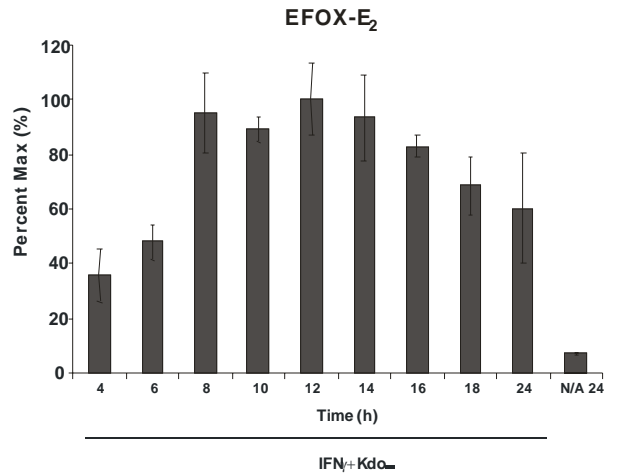

**Supplementary Fig. 6. EFOX production is time-dependent.** RAW264.7 cells were activated with Kdo<sub>2</sub> (0.5  $\mu$ g/ml) and IFN $\gamma$  (200 U/ml) and EFOX levels were quantified at indicated times post activation.
