# Supplementary material
Source: PubMed Central journal article supplement (PMC3077712)
Supplement: NIHMS283532-supplement-Supplemental_Figure_10.pdf [file NIHMS283532-supplement-Supplemental_Figure_10.pdf]

a

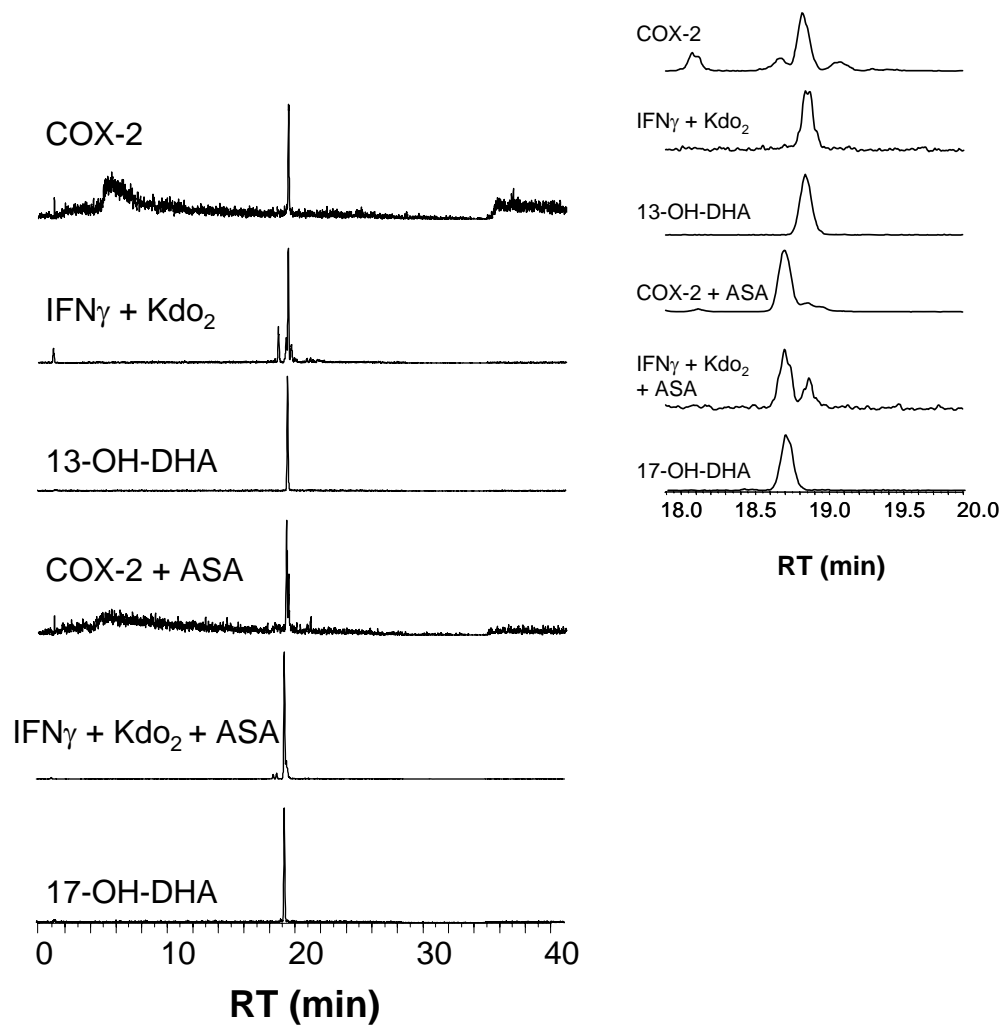

b

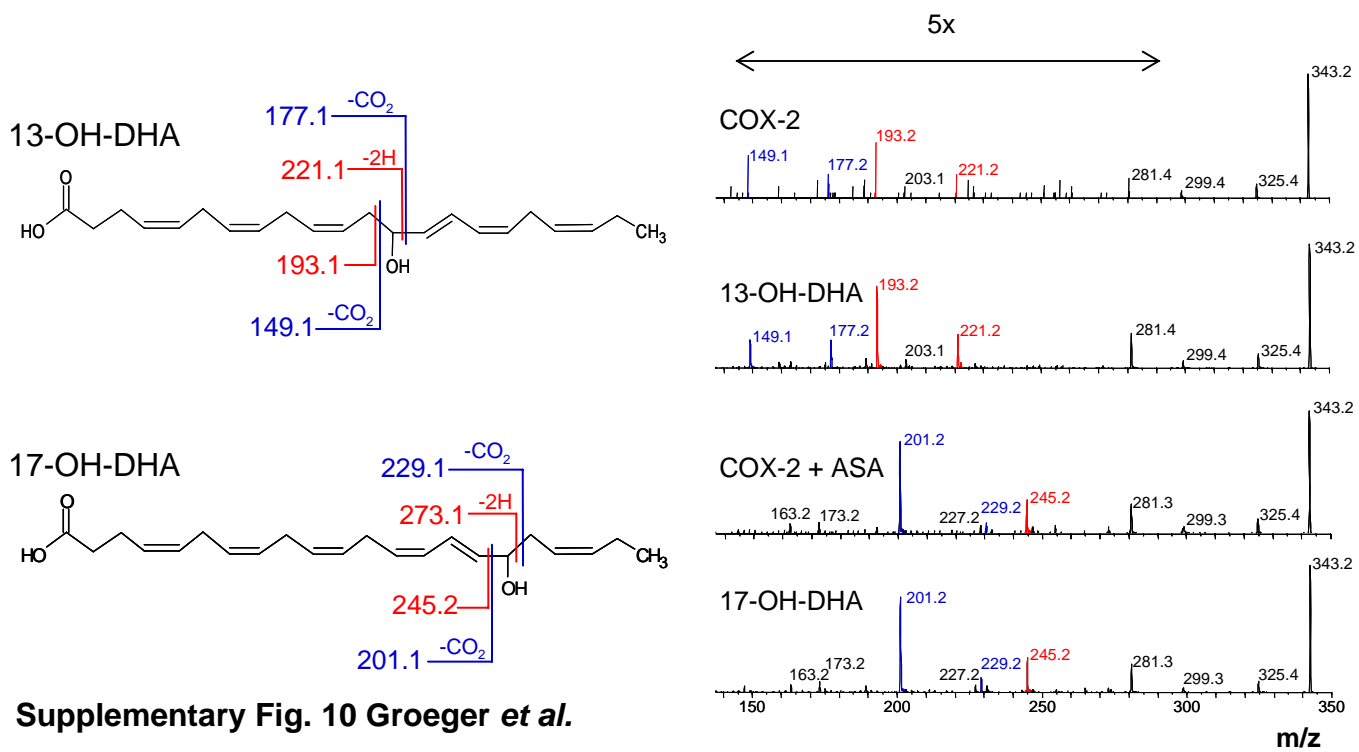

Supplementary Fig. 10 Groeger *et al.*

C

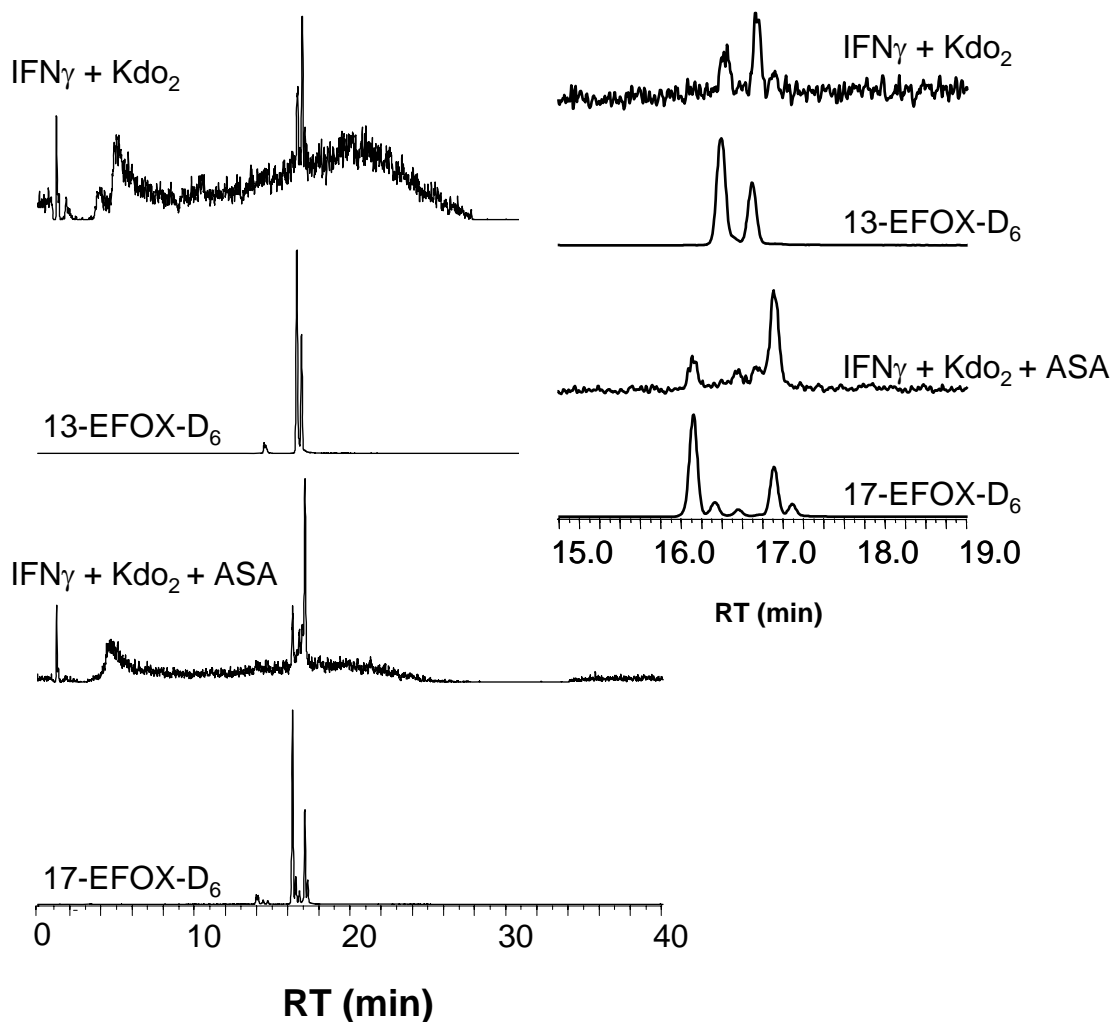

**Supplementary Figure 10. ASA-acetylated COX-2 produces 17-OH-DHA, rather than 13-OH-DHA, both *in vivo* and *in vitro*.** Chromatographic profiles (a) and mass spectra (b) of OH-DHA synthesized by COX-2 in presence of 10  $\mu$ M DHA  $\pm$ ASA. Chromatographic profiles of OH-DHA from cell lysates of activated RAW264.7 cells (Kdo<sub>2</sub> + IFN $\gamma$ )  $\pm$  ASA were also compared with 13-OH-DHA and 17-OH-DHA synthetic standards. c, Comparison of chromatographic profiles of EFOX-D<sub>6</sub> generated by activated RAW264.7 cells (Kdo<sub>2</sub> + IFN $\gamma$ )  $\pm$  ASA with 13-EFOX-D<sub>6</sub> and 17-EFOX-D<sub>6</sub> synthetic standards. The standards were enzymatically synthesized by incubating 20  $\mu$ M 13- or 17-OH-DHA with 3 $\alpha$ -hydroxysteroid dehydrogenase, in presence of 100 $\mu$ M NAD<sup>+</sup> for 10 min at 37°C. Enlarged chromatograms are reported in the insets.
